# Supplementary material
Source: PubMed Central journal article supplement (PMC8908565)
Supplement: 12954_2022_601_MOESM1_ESM.pdf [file 12954_2022_601_MOESM1_ESM.pdf]

**Table 1. Outcome variables, measures and assessment time points.**

| Outcome variable                                  | Measure                                                                        | Time point                                                 |
|---------------------------------------------------|--------------------------------------------------------------------------------|------------------------------------------------------------|
| Socio-demographic characteristics                 | Age                                                                            | Week 0 (baseline)                                          |
|                                                   | Gender                                                                         | Week 0                                                     |
|                                                   | Education                                                                      | Week 0                                                     |
|                                                   | Employment status                                                              | Week 0                                                     |
|                                                   | Source of income                                                               | Weeks 0-24 (0, 2, 4, 6, 8, 10, 12, 14, 16, 18, 20, 22, 24) |
| Drug use                                          | Drugs ever used                                                                | Week 0                                                     |
|                                                   | Age of first use (by drug)                                                     | Week 0                                                     |
|                                                   | Dugs used in the past 12 months                                                | Week 0                                                     |
|                                                   | Dugs used in the past 14 days                                                  | Weeks 0-24                                                 |
|                                                   | Route of administration (by drug)                                              | Weeks 0-24                                                 |
| Drug supply                                       | Source of drugs (by drug)                                                      | Weeks 0-24                                                 |
|                                                   | Price paid/dose                                                                | Weeks 0-24                                                 |
|                                                   | Perceived change in price (increase/no change/decrease)                        | Weeks 0-24                                                 |
|                                                   | Perceived change in quality (increase/no change/decrease)                      | Weeks 0-24                                                 |
|                                                   | Perceived access to drugs (easier/no change/more difficult)                    | Weeks 0-24                                                 |
| Frequency of use                                  | Times/day                                                                      | Weeks 0-24                                                 |
|                                                   | Days/week                                                                      | Weeks 0-24                                                 |
| History of overdose                               | Number of overdoses ever                                                       | Week 0                                                     |
|                                                   | Number of overdoses in the past 14 days                                        | Weeks 0-24                                                 |
|                                                   | Drug caused last overdose                                                      | Weeks 0-24                                                 |
| Drug treatment experience                         | Number of treatment episodes ever (by type)                                    | Week 0                                                     |
|                                                   | Currently in treatment (by type)                                               | Weeks 0-24                                                 |
|                                                   | Treatment initiation in the past 14 days (by type)                             | Weeks 0-24                                                 |
|                                                   | Number of days in treatment in the past 14 days (by type)                      | Weeks 0-24                                                 |
| Risk behavior related to the spread of infections | Frequency shared needle/syringe in the past 14 days                            | Weeks 0-24                                                 |
|                                                   | Receiving (yes/no) already filled in syringe in the past 14 days               | Weeks 0-24                                                 |
|                                                   | Using syringe (yes/no) filled from other syringe in the past 14 days           | Weeks 0-24                                                 |
|                                                   | Sharing injection instruments (yes/no) in the past 14 days                     | Weeks 0-24                                                 |
|                                                   | Frequency having clean needle/syringe for each injection in the past 14 days   | Weeks 0-24                                                 |
|                                                   | Frequency shared vaporizer, inhaler, tube, pipe in the past 14 days            | Weeks 0-24                                                 |
| Access to harm reduction                          | Source of clean needles/syringes in the past 14 days                           | Weeks 0-24                                                 |
|                                                   | Reasons not having clean needles/syringes in the past 14 days                  | Weeks 0-24                                                 |
|                                                   | Perceived change in access to harm reduction (easier/no change/more difficult) | Weeks 0-24                                                 |
| COVID-19 experience                               | Being tested for COVID (yes/no) and test results (-/+)                         | Weeks 0-24                                                 |
|                                                   | Being hospitalized for COVID (yes/no) and number of days                       | Weeks 0-24                                                 |

## Study questionnaire

**Q1.** Age:

Select the correct answer from the listing below and write the answer number in the box

**Q2.** Gender:

1. Male
2. Female
3. Nonbinary

**Q3.** What is the highest level of education you completed:

1. No education
2. Completed primary school (grades 1-4)
3. Incomplete high school education (grades 5-9)
4. Completed high school education (grades 10-12)
5. Completed high school-vocational education (technical college)
6. Incomplete university education (completed third year)
7. Completed university

**Q4.** Employment:

1. Unemployed
2. Employed (full time, part time, self-employed)
3. Student and employed
4. Student
5. Retired/social benefits

| Please insert <u>X</u> in the relevant cell to indicate “yes” or “no” for every substance listed; indicate the age of first use in the last column | Q5. Have you ever used without doctor’s prescription |    | Q6. Age of the first use |
|----------------------------------------------------------------------------------------------------------------------------------------------------|------------------------------------------------------|----|--------------------------|
|                                                                                                                                                    | yes                                                  | no |                          |
| 1. Heroin, syrets                                                                                                                                  |                                                      |    |                          |
| 2. Opium, black, shirka                                                                                                                            |                                                      |    |                          |
| 3. Street Methadone                                                                                                                                |                                                      |    |                          |
| 4. Methadone from program                                                                                                                          |                                                      |    |                          |
| 5. Street Subutex/Suboxone                                                                                                                         |                                                      |    |                          |
| 6. Subutex/Suboxone from program                                                                                                                   |                                                      |    |                          |
| 7. Cocaine, crack                                                                                                                                  |                                                      |    |                          |
| 8. Vint, jeff, Ephedr/Connifera vint                                                                                                               |                                                      |    |                          |
| 9. Amphetamine, metamphetanine(pill, powder, cristal)                                                                                              |                                                      |    |                          |
| 10. Cannabis (marijuana, hashish)                                                                                                                  |                                                      |    |                          |
| 11. Alcohol                                                                                                                                        |                                                      |    |                          |
| 12. Ecstasy, MDMA                                                                                                                                  |                                                      |    |                          |
| 13. NBOMe                                                                                                                                          |                                                      |    |                          |
| 14. Ketamine                                                                                                                                       |                                                      |    |                          |
| 15. LSD                                                                                                                                            |                                                      |    |                          |
| 16. Other hallucinogens (mushrooms, psilocybin, belladonna)                                                                                        |                                                      |    |                          |
| 17. Volatile solvents, inhalants (glue, benzene, “rastvaritel”)                                                                                    |                                                      |    |                          |
| 18. Psychotropic myorelaxants (Lirica, Gabba-gamma, Baclosan, Gabapentine, Rivotril)                                                               |                                                      |    |                          |
| 19. Psychotropic, sedatives, tranquilizers (benzos, Diazepam, Relanium, Fenasepam, Ciclodol)                                                       |                                                      |    |                          |
| 20. Antihistamines, alone or as additions to the main drug (Dimedrol, Pipolphen, Suprastin)                                                        |                                                      |    |                          |
| 21. Synthetic cannabinoids (spices)                                                                                                                |                                                      |    |                          |
| 22. Synthetic cathinones (bath salts, PVP, alpha-PVP, MDPV, Mephedrone)                                                                            |                                                      |    |                          |
| 23. Other                                                                                                                                          |                                                      |    |                          |



|                                                                                              | receiving by post | drug was hidden in advance |  |  |  |  |  |  |
|----------------------------------------------------------------------------------------------|-------------------|----------------------------|--|--|--|--|--|--|
| 1. Heroin, syrets                                                                            |                   |                            |  |  |  |  |  |  |
| 2. Opium, black, shirka                                                                      |                   |                            |  |  |  |  |  |  |
| 3. Street Methadone                                                                          |                   |                            |  |  |  |  |  |  |
| 4. Methadone from program                                                                    |                   |                            |  |  |  |  |  |  |
| 5. Street Subutex/Suboxone                                                                   |                   |                            |  |  |  |  |  |  |
| 6. Subutex/Suboxone from program                                                             |                   |                            |  |  |  |  |  |  |
| 7. Cocaine, crack                                                                            |                   |                            |  |  |  |  |  |  |
| 8. Vint, jeff, Ephedr/Connifera vint                                                         |                   |                            |  |  |  |  |  |  |
| 9. Amphetamine, metamphetamine (pill, powder, cristal)                                       |                   |                            |  |  |  |  |  |  |
| 10. Cannabis (marijuana, hashish)                                                            |                   |                            |  |  |  |  |  |  |
| 11. Alcohol                                                                                  |                   |                            |  |  |  |  |  |  |
| 12. Ecstasy, MDMA                                                                            |                   |                            |  |  |  |  |  |  |
| 13. NBOMe                                                                                    |                   |                            |  |  |  |  |  |  |
| 14. Ketamine                                                                                 |                   |                            |  |  |  |  |  |  |
| 15. LSD                                                                                      |                   |                            |  |  |  |  |  |  |
| 16. Other hallucinogens (mushrooms, psilocybin, belladonna)                                  |                   |                            |  |  |  |  |  |  |
| 17. Volatile solvents, inhalants (glue, benzene, "rastvaritel")                              |                   |                            |  |  |  |  |  |  |
| 18. Psychotropic myorelaxants (Lirica, Gabba-gamma, Baclosan, Gabapentine, Rivotril)         |                   |                            |  |  |  |  |  |  |
| 19. Psychotropic, sedatives, tranquilizers (benzos, Diazepam, Relanium, Fenasepam, Ciclodol) |                   |                            |  |  |  |  |  |  |
| 20. Antihistamines, alone or as additions to the main drug (Dimedrol, Pipolphen, Suprastin)  |                   |                            |  |  |  |  |  |  |
| 21. Synthetic cannabinoids (spices)                                                          |                   |                            |  |  |  |  |  |  |
| 22. Synthetic cathinones (bath salts, PVP, alpha-PVP, MDPV, Mephedrone)                      |                   |                            |  |  |  |  |  |  |
| 23. Other                                                                                    |                   |                            |  |  |  |  |  |  |

|                         | <b>Q9. (If buying a drug or ingredients for preparing a drug) How much did you pay for your single average dose prior to March 2020 (in national currency) [display only substances checked in Q7]</b> |
|-------------------------|--------------------------------------------------------------------------------------------------------------------------------------------------------------------------------------------------------|
| 1. Heroin, syrets       |                                                                                                                                                                                                        |
| 2. Opium, black, shirka |                                                                                                                                                                                                        |

|                                                                                              |  |
|----------------------------------------------------------------------------------------------|--|
| 3. Street Methadone                                                                          |  |
| 4. Methadone from program                                                                    |  |
| 5. Street Subutex/Suboxone                                                                   |  |
| 6. Subutex/Suboxone from program                                                             |  |
| 7. Cocaine, crack                                                                            |  |
| 8. Vint, jeff, Ephedr/Connifera vint                                                         |  |
| 9. Amphetamine, metamphetamine (pill, powder, cristal)                                       |  |
| 10. Cannabis (marijuana, hashish)                                                            |  |
| 11. Alcohol                                                                                  |  |
| 12. Ecstasy, MDMA                                                                            |  |
| 13. NBOMe                                                                                    |  |
| 14. Ketamine                                                                                 |  |
| 15. LSD                                                                                      |  |
| 16. Other hallucinogens (mushrooms, psilocybin, belladonna)                                  |  |
| 17. Volatile solvents, inhalants (glue, benzene, "rastvaritel")                              |  |
| 18. Psychotropic myorelaxants (Lirica, Gabba-gamma, Baclosan, Gabapentine, Rivotril)         |  |
| 19. Psychotropic, sedatives, tranquilizers (benzos, Diazepam, Relanium, Fenasepam, Ciclodol) |  |
| 20. Antihistamines, alone or as additions to the main drug (Dimedrol, Pipolphen, Suprastin)  |  |
| 21. Synthetic cannabinoids (spices)                                                          |  |
| 22. Synthetic cathinones (bath salts, PVP, alpha-PVP, MDPV, Mephedrone)                      |  |
| 23. Other                                                                                    |  |

| <b>Report here ONLY on substances that you used regularly (at least once a week) for 3 months prior to March 2020</b><br>[display only substances checked in Q7] |                                                                              |                                                                              |
|------------------------------------------------------------------------------------------------------------------------------------------------------------------|------------------------------------------------------------------------------|------------------------------------------------------------------------------|
|                                                                                                                                                                  | <b>Q 10. Prior to March 2020, as usual, how many times a day did you use</b> | <b>Q 11. Prior to March 2020, as usual, how many days a week did you use</b> |
| 1. Heroin, syrets                                                                                                                                                |                                                                              |                                                                              |
| 2. Opium, black, shirka                                                                                                                                          |                                                                              |                                                                              |
| 3. Street Methadone                                                                                                                                              |                                                                              |                                                                              |
| 4. Methadone from program                                                                                                                                        |                                                                              |                                                                              |
| 5. Street Subutex/Suboxone                                                                                                                                       |                                                                              |                                                                              |
| 6. Subutex/Suboxone from program                                                                                                                                 |                                                                              |                                                                              |
| 7. Cocaine, crack                                                                                                                                                |                                                                              |                                                                              |
| 8. Vint, jeff, Ephedr/Connifera vint                                                                                                                             |                                                                              |                                                                              |
| 9. Amphetamine, metamphetamine (pill, powder, cristal)                                                                                                           |                                                                              |                                                                              |
| 10. Cannabis (marijuana, hashish)                                                                                                                                |                                                                              |                                                                              |
| 11. Alcohol                                                                                                                                                      |                                                                              |                                                                              |
| 12. Ecstasy, MDMA                                                                                                                                                |                                                                              |                                                                              |
| 13. NBOMe                                                                                                                                                        |                                                                              |                                                                              |
| 14. Ketamine                                                                                                                                                     |                                                                              |                                                                              |
| 15. LSD                                                                                                                                                          |                                                                              |                                                                              |
| 16. Other hallucinogens (mushrooms, psilocybin, belladonna)                                                                                                      |                                                                              |                                                                              |
| 17. Volatile solvents, inhalants (glue, benzene, "rastvaritel")                                                                                                  |                                                                              |                                                                              |
| 18. Psychotropic myorelaxants (Lirica, Gabba-gamma, Baclosan, Gabapentine, Rivotril)                                                                             |                                                                              |                                                                              |
| 19. Psychotropic, sedatives, tranquilizers (benzos, Diazepam, Relanium, Fenasepam, Ciclodol)                                                                     |                                                                              |                                                                              |
| 20. Antihistamines, alone or as additions to the main drug (Dimedrol, Pipolphen, Suprastin)                                                                      |                                                                              |                                                                              |
| 21. Synthetic cannabinoids (spices)                                                                                                                              |                                                                              |                                                                              |
| 22. Synthetic cathinones (bath salts, PVP, alpha-PVP, MDPV, Mephedrone)                                                                                          |                                                                              |                                                                              |
| 23. Other                                                                                                                                                        |                                                                              |                                                                              |

**Q12.** How many times had you overdosed on drugs in your lifetime?

[skip to [Q14](#) if "0"]

**Q13.** What substance was the cause of overdose at the last overdose episode? [display only substances checked in Q5]

**Q14.** How many times have you ever received treatment due to your drug problems?

|   |                            | Number of treatment episodes | Check if currently in treatment |
|---|----------------------------|------------------------------|---------------------------------|
| 0 | No treatment               |                              |                                 |
| 1 | Outpatient detoxification  |                              |                                 |
| 2 | Detoxification residential |                              |                                 |
| 3 | Outpatient substitution    |                              |                                 |
| 4 | Outpatient drug-free       |                              |                                 |
| 5 | Drug-free residential      |                              |                                 |
| 6 | Day care                   |                              |                                 |
| 7 | Psychiatric hospital       |                              |                                 |
| 8 | Other hospital/ward        |                              |                                 |
| 9 | Other treatment            |                              |                                 |

**Q15.** How would you describe your main source of income BEFORE March 2020 [choose all that apply]?

- 1 Full time / part time job
- 2 Seasonal / temporary job
- 3 Social payments (stipend, pension)
- 4 Support of other people (spouse, other relatives)
- 5 Illegal activities
- 6 Other

**Q16. Indicate which substance did you use during the past 14 days without doctor's prescription and by what rout**

|                                                                                              | 1. injection | 2. Drinking/Swallowing/eating | 3. smoking | 4. vaporizing | 5. snorting | 6. inhaling | 7. supra/sub-lingual |
|----------------------------------------------------------------------------------------------|--------------|-------------------------------|------------|---------------|-------------|-------------|----------------------|
| 1. Heroin, syrets                                                                            |              |                               |            |               |             |             |                      |
| 2. Opium, black, shirka                                                                      |              |                               |            |               |             |             |                      |
| 3. Street Methadone                                                                          |              |                               |            |               |             |             |                      |
| 4. Methadone from program                                                                    |              |                               |            |               |             |             |                      |
| 5. Street Subutex/Suboxone                                                                   |              |                               |            |               |             |             |                      |
| 6. Subutex/Suboxone from program                                                             |              |                               |            |               |             |             |                      |
| 7. Cocaine, crack                                                                            |              |                               |            |               |             |             |                      |
| 8. Vint, jeff, Ephedr/Connifera vint                                                         |              |                               |            |               |             |             |                      |
| 9. Amphetamine, metamphetamine (pill, powder, cristal)                                       |              |                               |            |               |             |             |                      |
| 10. Cannabis (marijuana, hashish)                                                            |              |                               |            |               |             |             |                      |
| 11. Alcohol                                                                                  |              |                               |            |               |             |             |                      |
| 12. Ecstasy, MDMA                                                                            |              |                               |            |               |             |             |                      |
| 13. NBOMe                                                                                    |              |                               |            |               |             |             |                      |
| 14. Ketamine                                                                                 |              |                               |            |               |             |             |                      |
| 15. LSD                                                                                      |              |                               |            |               |             |             |                      |
| 16. Other hallucinogens (mushrooms, psilocybin, belladonna)                                  |              |                               |            |               |             |             |                      |
| 17. Volatile solvents, inhalants (glue, benzene, "rastvaritel")                              |              |                               |            |               |             |             |                      |
| 18. Psychotropic myorelaxants (Lirica, Gabba-gamma, Baclosan, Gabapentine, Rivotril)         |              |                               |            |               |             |             |                      |
| 19. Psychotropic, sedatives, tranquilizers (benzos, Diazepam, Relanium, Fenasepam, Ciclodol) |              |                               |            |               |             |             |                      |
| 20. Antihistamines, alone or as additions to the main drug (Dimedrol, Pipolphen, Suprastin)  |              |                               |            |               |             |             |                      |
| 21. Synthetic cannabinoids (spices)                                                          |              |                               |            |               |             |             |                      |



|                                                                         |  |  |  |  |  |  |  |  |
|-------------------------------------------------------------------------|--|--|--|--|--|--|--|--|
| 22. Synthetic cathinones (bath salts, PVP, alpha-PVP, MDPV, Mephedrone) |  |  |  |  |  |  |  |  |
| 23. Other                                                               |  |  |  |  |  |  |  |  |

|                                                                                              | <b>Q 18. (If buying a drug or ingredients for preparing a drug) for the past 14 days how much did you pay for your single average dose (in national currency)</b> |
|----------------------------------------------------------------------------------------------|-------------------------------------------------------------------------------------------------------------------------------------------------------------------|
| 1. Heroin, syrets                                                                            |                                                                                                                                                                   |
| 2. Opium, black, shirka                                                                      |                                                                                                                                                                   |
| 3. Street Methadone                                                                          |                                                                                                                                                                   |
| 4. Methadone from program                                                                    |                                                                                                                                                                   |
| 5. Street Subutex/Suboxone                                                                   |                                                                                                                                                                   |
| 6. Subutex/Suboxone from program                                                             |                                                                                                                                                                   |
| 7. Cocaine, crack                                                                            |                                                                                                                                                                   |
| 8. Vint, jeff, Ephedr/Connifera vint                                                         |                                                                                                                                                                   |
| 9. Amphetamine, metamphetanine(pill, powder, cristal)                                        |                                                                                                                                                                   |
| 10. Cannabis (marijuana, hashish)                                                            |                                                                                                                                                                   |
| 11. Alcohol                                                                                  |                                                                                                                                                                   |
| 12. Ecstasy, MDMA                                                                            |                                                                                                                                                                   |
| 13. NBOMe                                                                                    |                                                                                                                                                                   |
| 14. Ketamine                                                                                 |                                                                                                                                                                   |
| 15. LSD                                                                                      |                                                                                                                                                                   |
| 16. Other hallucinogens (mushrooms, psilocybin, belladonna)                                  |                                                                                                                                                                   |
| 17. Volatile solvents, inhalants (glue, benzene, "rastvaritel")                              |                                                                                                                                                                   |
| 18. Psychotropic myorelaxants (Lirica, Gabba-gamma, Baclosan, Gabapentine, Rivotril)         |                                                                                                                                                                   |
| 19. Psychotropic, sedatives, tranquilizers (benzos, Diazepam, Relanium, Fenasepam, Ciclodol) |                                                                                                                                                                   |
| 20. Antihistamines, alone or as additions to the main drug (Dimedrol, Pipolphen, Suprastin)  |                                                                                                                                                                   |
| 21. Synthetic cannabinoids (spices)                                                          |                                                                                                                                                                   |
| 22. Synthetic cathinones (bath salts, PVP, alpha-PVP, MDPV, Mephedrone)                      |                                                                                                                                                                   |
| 23. Other                                                                                    |                                                                                                                                                                   |

|                                                                 | <b>Q19. During the past 14 days, as usual, how many times a day did you use</b> | <b>Q20. During the past 14 days, as usual, how many days a week did you use</b> |
|-----------------------------------------------------------------|---------------------------------------------------------------------------------|---------------------------------------------------------------------------------|
| 1. Heroin, syrets                                               |                                                                                 |                                                                                 |
| 2. Opium, black, shirka                                         |                                                                                 |                                                                                 |
| 3. Street Methadone                                             |                                                                                 |                                                                                 |
| 4. Methadone from program                                       |                                                                                 |                                                                                 |
| 5. Street Subutex/Suboxone                                      |                                                                                 |                                                                                 |
| 6. Subutex/Suboxone from program                                |                                                                                 |                                                                                 |
| 7. Cocaine, crack                                               |                                                                                 |                                                                                 |
| 8. Vint, jeff, Ephedr/Connifera vint                            |                                                                                 |                                                                                 |
| 9. Amphetamine, metamphetanine(pill, powder, cristal)           |                                                                                 |                                                                                 |
| 10. Cannabis (marijuana, hashish)                               |                                                                                 |                                                                                 |
| 11. Alcohol                                                     |                                                                                 |                                                                                 |
| 12. Ecstasy, MDMA                                               |                                                                                 |                                                                                 |
| 13. NBOMe                                                       |                                                                                 |                                                                                 |
| 14. Ketamine                                                    |                                                                                 |                                                                                 |
| 15. LSD                                                         |                                                                                 |                                                                                 |
| 16. Other hallucinogens (mushrooms, psilocybin, belladonna)     |                                                                                 |                                                                                 |
| 17. Volatile solvents, inhalants (glue, benzene, "rastvaritel") |                                                                                 |                                                                                 |



|                                                                                              |  |  |
|----------------------------------------------------------------------------------------------|--|--|
| 18. Psychotropic myorelaxants (Lirica, Gabba-gamma, Baclosan, Gabapentine, Rivotril)         |  |  |
| 19. Psychotropic, sedatives, tranquilizers (benzos, Diazepam, Relanium, Fenasepam, Ciclodol) |  |  |
| 20. Antihistamines, alone or as additions to the main drug (Dimedrol, Pipolphen, Suprastin)  |  |  |
| 21. Synthetic cannabinoids (spices)                                                          |  |  |
| 22. Synthetic cathinones (bath salts, PVP, alpha-PVP, MDPV, Mephedrone)                      |  |  |
| 23. Other                                                                                    |  |  |

**Q21.** How many times have you overdosed on drugs during the past 14 days? [skip to Q23 if “0”]

**Q22.** What substance was the cause of overdose at the last overdose episode? [display only substances checked in Q16]

**Q23.** Have you initiated or continued drug treatment during the past 14 days? [skip to Q25 if “0”]

|   |                            | Continued (yes/no) | Initiated (yes/no) |
|---|----------------------------|--------------------|--------------------|
| 0 | No treatment               |                    |                    |
| 1 | Outpatient detoxification  |                    |                    |
| 2 | Detoxification residential |                    |                    |
| 3 | Outpatient substitution    |                    |                    |
| 4 | Outpatient drug-free       |                    |                    |
| 5 | Drug-free residential      |                    |                    |
| 6 | Day care                   |                    |                    |
| 7 | Psychiatric hospital       |                    |                    |
| 8 | Other hospital/ward        |                    |                    |
| 9 | Other treatment            |                    |                    |

**Q24.** How many days of the past 14 days have you received treatment? [display treatments checked in Q23]

|   |                            | Number days in treatment |
|---|----------------------------|--------------------------|
| 1 | Outpatient detoxification  |                          |
| 2 | Detoxification residential |                          |
| 3 | Outpatient substitution    |                          |
| 4 | Outpatient drug-free       |                          |
| 5 | Drug-free residential      |                          |
| 6 | Day care                   |                          |
| 7 | Psychiatric hospital       |                          |
| 8 | Other hospital/ward        |                          |
| 9 | Other treatment            |                          |

**Q25.** In your opinion, how did the **price** of your main drug change in the past 14 days?

1. Became cheaper
2. Did not change
3. Became more expensive

**Q26.** In your opinion, how did the **quality** of your main drug change in the past 14 days?

1. Became better
2. Did not change
3. Became worse

**Q27.** In your opinion, how did the **access to** your main drug change in the past 14 days?

1. Became easier to get
2. Did not change
3. Became harder to get

**Q28.** In your opinion, how did **access to harm reduction programs** change in the past 14 days?

1. Became easier

2. Did not change
3. Became worse
4. Did not use harm reduction programs

**Q29.** Think about the times you injected drugs in the past 14 days. How often was it with a needle or syringe that had been previously used by someone else?

1. Always
2. Most times
3. About half the time
4. Occasionally
5. Never
6. I did not inject in the past 14 days [skip to Q36]

**Q30.** Have you received/ bought an injection from an already filled syringe (i.e. you did not see how it was filled) in the last 14 days?

1. Yes
0. No

**Q31.** In the last 14 days when you injected drugs, did you use a syringe, filled by someone from his / her already used syringe (direct or reverse filling, several doses in one syringe)?

1. Yes
0. No

**Q32.** Have you used common instruments for sharing (preparation) of a drug at least once in the last 14 days?

1. Yes
0. No

**Q33.** In the past 14 days, you had a clean needle for each injection:

1. Always
2. Most times
3. About half the time
4. Occasionally
5. Never

**Q34.** Where did you get clean needles/syringes in the past 14 days? (check all that apply)

1. Bought in a pharmacy
2. Received for free in a pharmacy
3. Received for free from vending machine
4. Received from a harm reduction program social worker (i.e. at a syringe exchange site, at an NGO, through outreach)
5. Got it from a friend or partner
6. Got a used syringe/needle from a friend or partner
7. Used my previously used needles/syringes
8. Bought the drug in pre-filled syringe
9. Found a used syringe/needle on the street
10. Other

**Q35.** What were the reasons you did not have enough clean needles/syringes for each injection in the past 14 days? (check all that apply)

0. I had clean needles/syringes for each injection
1. The pharmacy did not work as usual
2. The harm reduction program did not work as usual
3. I don't have enough money
4. The transportation did not work
5. I stayed at home because of the quarantine
6. I was sick
7. Other

**Q36.** Think about the times you smoked, vaporized or inhaled drugs in the past 14 days. How often did you share the device or instrument (vaporizer, tube, pipe, stem tip) with someone else (you used after someone or the other person used it after you)?

1. Always
2. Most times
3. About half the time
4. Occasionally
5. Never
6. I did not smoke, vaporized or inhaled drugs in the past 14 days

**Q37.** How would you describe your main source of income for the past 14 days [choose all that apply]?

1. Full time / part time job
2. Seasonal / temporary job
3. Social payments (stipend, pension)
4. Support of other people (spouse, other relatives)
5. Illegal activities
6. Other

**Q38.** Have you been tested for COVID in the past 14 days?

- 1 Yes and I was negative
- 2 Yes and I was positive
- 3 Yes and I am waiting for the result
- 4 No

**Q39.** Have you been hospitalized, and for how many days, in the past 14 days?

- 1 Yes for suspected COVID-19 (#days)
- 2 Yes for other (non COVID-19 related) reasons (#days)
- 2 No
